# Supplementary material for: Health-related quality of life of carfilzomib- and daratumumab-based therapies in patients with relapsed/refractory multiple myeloma, based on German benefit assessment data
Source: Springer Nature journal article supplement (doi:10.1007/s11136-019-02307-5), 2019-09-24
Supplement: MOESM1 [file 17204916]

**Supplemental Table 1** Return rates for quality of life questionnaires in patients who were alive and receiving study treatment at each timepoint in the ASPIRE, ENDEAVOR, POLLUX, and CASTOR trials

| <b>ASPIRE</b>                                              |                 |                |                |                             |                             |
|------------------------------------------------------------|-----------------|----------------|----------------|-----------------------------|-----------------------------|
| <b>EORTC QLQ-C30</b>                                       | <b>Baseline</b> | <b>Cycle 3</b> | <b>Cycle 6</b> | <b>Cycle 12</b>             | <b>Cycle 18</b>             |
| KRd, <i>n/N</i> (%)                                        | 376/394 (95.4)  | 357/382 (93.5) | 327/363 (90.1) | 256/305 (83.9)              | 227/262 (86.6)              |
| Rd, <i>n/N</i> (%)                                         | 369/394 (93.7)  | 338/372 (90.9) | 284/341 (83.3) | 212/263 (80.6)              | 148/186 (79.6)              |
| <b>EORTC QLQ-MY20</b>                                      |                 |                |                |                             |                             |
| KRd, <i>n/N</i> (%)                                        | 373/394 (94.7)  | 353/382 (92.4) | 324/363 (89.3) | 255/305 (83.6)              | 223/262 (85.1)              |
| Rd, <i>n/N</i> (%)                                         | 366/394 (92.9)  | 334/372 (89.8) | 284/341 (83.3) | 211/263 (80.2)              | 147/186 (79.0)              |
| <b>ENDEAVOR</b>                                            |                 |                |                |                             |                             |
| <b>EORTC QLQ-C30,<br/>EORTC QLQ-MY20,<br/>FACT/GOG-Ntx</b> | <b>Baseline</b> | <b>Cycle 3</b> | <b>Cycle 6</b> | <b>Cycle 12</b>             | <b>Cycle 18</b>             |
| Kd, <i>n/N</i> (%)                                         | 407/464 (87.7)  | 383/408 (93.9) | 298/343 (86.9) | 137/159 (86.2)              | 41/44 (93.2)                |
| Vd, <i>n/N</i> (%)                                         | 392/465 (84.3)  | 336/388 (86.6) | 222/254 (87.4) | 73/80 (91.3)                | 11/12 (91.7)                |
| <b>POLLUX</b>                                              |                 |                |                |                             |                             |
| <b>EORTC QLQ-C30</b>                                       | <b>Baseline</b> | <b>Cycle 3</b> | <b>Cycle 6</b> | <b>Cycle 12</b>             | <b>Cycle 18</b>             |
| DRd, <i>n/N</i> (%)                                        | 252/286 (88.1)  | 234/269 (87.0) | 229/254 (90.2) | 197/216 (91.2)              | 36/39 (92.3)                |
| Rd, <i>n/N</i> (%)                                         | 259/283 (91.5)  | 212/263 (80.6) | 194/225 (86.2) | 143/165 (86.7)              | 14/20 (70.0)                |
| <b>CASTOR</b>                                              |                 |                |                |                             |                             |
| <b>EORTC QLQ-C30</b>                                       | <b>Baseline</b> | <b>Cycle 3</b> | <b>Cycle 6</b> | <b>Cycle 12<sup>a</sup></b> | <b>Cycle 18<sup>a</sup></b> |
| DVd, <i>n/N</i> (%)                                        | 226/251 (90.0)  | 197/218 (90.4) | 192/207 (92.8) | 71/77 (92.2)                | 1/2 (50.0)                  |
| Vd, <i>n/N</i> (%)                                         | 219/247 (88.7)  | 187/209 (89.5) | 151/165 (91.5) | –                           | –                           |

<sup>a</sup>Vd therapy was discontinued after eight cycles in both treatment arms; in the DVd arm, daratumumab monotherapy continued until cycle 18

*DRd* daratumumab/lenalidomide/dexamethasone, *DVd* daratumumab/bortezomib/dexamethasone, *EORTC* European Organisation for Research and Treatment of Cancer, *FACT/GOG-Ntx* Functional Assessment of Cancer Therapy/Gynecologic Oncology Group-Neurotoxicity scale, *Kd* carfilzomib/dexamethasone, *KRd* carfilzomib/lenalidomide/dexamethasone, *MY20* EORTC 20-item Myeloma Specific Questionnaire, *QLQ-C30* EORTC 30-item Quality of Life Questionnaire, *Rd* lenalidomide/dexamethasone, *Vd* bortezomib/dexamethasone

**Supplemental Table 2** Time to adverse events with carfilzomib-based therapy and daratumumab-based therapy versus comparator

| Carfilzomib-based therapy | ASPIRE            |                   |                                |            | ENDEAVOR         |                   |                                |            |
|---------------------------|-------------------|-------------------|--------------------------------|------------|------------------|-------------------|--------------------------------|------------|
|                           | KRd<br>(n = 396)  | Rd<br>(n = 396)   | HR<br>(95% CI)                 | p<br>value | Kd<br>(n = 464)  | Vd<br>(n = 465)   | HR<br>(95% CI)                 | p<br>value |
| Any AE                    | 0.3 (0.1, 0.3)    | 0.4 (0.3, 0.5)    | – (–)                          | –          | 0.1 (0.1, 0.2)   | 0.2 (0.2, 0.3)    | – (–)                          | –          |
| Serious AE                | 12.7 (0.1, 16.0)  | 15.4 (12.7, 19.1) | 1.06 (0.89, 1.27)              | 0.151      | 10.9 (8.8, 14.3) | 16.4 (13.8, 22.7) | 1.22 (1.01, 1.47)              | 0.040      |
| Severe AE (Grade ≥3)      | 16.9 (13.7, 22.7) | 20.9 (18.7, 27.3) | 1.11 (0.92, 1.34)              | 0.290      | 3.1 (2.3, 4.0)   | 2.9 (2.4, 3.8)    | 1.06 (0.92, 1.24)              | 0.413      |
| Discontinuation due to AE |                   |                   |                                |            |                  |                   |                                |            |
| Total study medication    | – (–)             | – (–)             | 0.93 <sup>a</sup> (0.70, 1.23) | 0.683      | 33.1 (23.1, –)   | – (33.9, –)       | 1.11 <sup>a</sup> (0.90, 1.37) | 0.530      |
| ≥ 1 study medication      | – (–)             | – (–)             | 1.11 <sup>a</sup> (0.90, 1.37) | 0.370      | – (31.7, –)      | – (35.5, –)       | 1.15 <sup>a</sup> (0.91, 1.46) | 0.248      |
| Daratumumab-based therapy | POLLUX            |                   |                                |            | CASTOR           |                   |                                |            |
|                           | DRd<br>(n = 286)  | Rd<br>(n = 283)   | HR<br>(95% CI)                 | p<br>value | DVd<br>(n = 251) | Vd<br>(n = 247)   | HR<br>(95% CI)                 | p<br>value |
| Any AE                    | –                 | –                 | –                              | –          | –                | –                 | –                              | –          |
| Serious AE                | 14.3 (–)          | 16.8 (–)          | 1.14 (0.90, 1, 44)             | 0.290      | 14.1 (–)         | – (–)             | 1.24 (0.92, 1.65)              | 0.153      |
| Severe AE (Grade ≥ 3)     | 1.0 (–)           | 3.4 (–)           | 1.39 (1.15, 1.68)              | < 0.001    | 1.2 (–)          | 1.9 (–)           | 1.42 (1.14, 1.77)              | 0.002      |
| Discontinuation due to AE |                   |                   |                                |            |                  |                   |                                |            |
| Total study medication    | – (–)             | – (–)             | 0.99 <sup>a</sup> (0.58, 1.71) | < 0.999    | – (–)            | – (–)             | 0.98 <sup>a</sup> (0.56, 1.71) | < 0.999    |
| ≥ 1 study medication      | – (–)             | – (–)             | – (–)                          | – (–)      | – (–)            | – (–)             | 1.00 (0.67, 1.50)              | < 0.999    |

<sup>a</sup>Risk ratio

Data are presented as median (95% CI) months, with no adjustment for treatment exposure

AE adverse event, CI confidence interval, DRd daratumumab/lenalidomide/dexamethasone, DVd daratumumab/bortezomib/dexamethasone, HR hazard ratio, Kd carfilzomib/dexamethasone, KRd carfilzomib/lenalidomide/dexamethasone, Rd lenalidomide/dexamethasone, Vd bortezomib/dexamethasone

**Supplemental Fig. 1** Forest plot showing hazard ratios for differences between bortezomib/dexamethasone and carfilzomib/dexamethasone (ENDEAVOR trial) for time to  $\geq 10$ -point deterioration in subscales of the EORTC QLQ-MY20

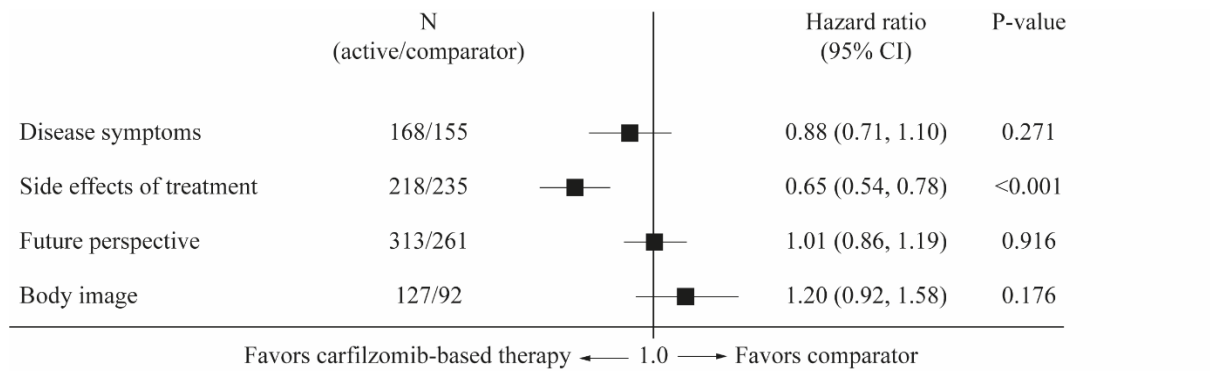

*CI* confidence interval, *EORTC* European Organisation for Research and Treatment of Cancer, *QLQ-MY20* EORTC 20-item Myeloma Specific Questionnaire
